# Supplementary material for: Extending the CARE Principles from tribal research policies to benefit sharing in genomic research
Source: Front Genet. 2022 Nov 11;13:1052620. doi: 10.3389/fgene.2022.1052620 (PMC9691892; doi:10.3389/fgene.2022.1052620)
Supplement: Supplementary file 1 [file Table2.XLSX]

## Sheet: Supplementary Table 2 (redact)
SUPPLEMENTARY TABLE 2. Types of Benefits in Tribal Research Governance Documents
Benefits	Descriptor Text	Tribal Code Excerpt 1	Tribal Code Excerpt 2
a. Economic
1. Compensation	This term is used in two main senses: (1) money paid directly to research participants, informants, or consultants (e.g., honoraria) and (2) a range of less direct benefits that may or may not be financial (a recurring list includes "receiving copies of publications, authorship or co-authorship, royalties or fair monetary compensation, copyright or patent, coverage of training/education or outrea…	Notably, [the Tribe] does not consider the first sense a research benefit "but rather compensation for research-related inconveniences"; the Tribe defines a research benefit as a "health-related, psychosocial, or other value [going] to an individual research subject, or something that will contribute to the acquisition of generalizable knowledge" Full quote = "A research benefit is considered to …	Just compensation or fair return includes but is not limited to: obtaining copies of the research findings, authorship, co-authorship or acknowledgment, royalties, fair monetary compensation, copyright, patent, trademark, compensation for expenses incurred in reviewing/advising researchers, coverage of training/education or outreach expenses or other forms of compensation. (Tribe 25)
2. Value from commercialization/profit (separate heading for “royalties” below)	This makes explicit reference to the development of products or possibility of commercialization. This reflects an understanding that most research won't lead to commercial products but in the event that does happen the Tribe should be part of negotiating what benefits they receive.	Where any of the products of the research are to be used for commercial purposes, a separate agreement will be made specifying the bases on which sales are to be made and the proceeds of sales are to be distributed. Where research is engaged in for commercial purposes, it is the responsibility of the researcher to make all informants and suppliers of information aware of this fact, and to come to…	The [Tribe] reserve[s] the right to charge a fee for issuance of a permit in the event that the subject study, survey or research project is being conducted for profit or if the results of the study, survey or research project, or publication thereof, are intended to, or are likely to produce financial benefit to the individual, corporation, agency or institution conducting the study, survey or r…
3. Royalties	This refers to expectations that royalties arising from research activities or their derivatives will be shared with communities	Research Applicant must submit a research proposal packet to the ERB for review and approval that includes all of the following: ...... Benefits and Risks: including steps that will be taken to protect participants ... Intent or plan to publish research and potential for royalties. .... (Tribe 12)	Equity. The applicant must demonstrate how the participants and the Tribe will be given a fair and appropriate return for cooperation in the research. Just compensation or fair return includes, but is not limited to: (a) Obtaining copies of the research findings; (b) Authorship, co-authorship or acknowledgment; (c) Royalties, fair monetary compensation, (d) Copyright, patent, trademark, (e) Compe…
4. Intellectual property (patents, copyright, trademark)	This refers to expectations that tribal control of information and knowledge will be maintained through assigning exclusively or in a negotiated manner any applicable IP rights.	[The Tribe] shall retain all ownership, property, trademark, copyright, and other rights to cultural, linguistic, and historic information that is not the intellectual property of the Researcher. (Tribe 14)	Works created for hire and copyrighted works transferred to the [Tribe] shall be deemed to be the property of the [Tribe]. (research code, 8.f, information); Publishing rights royalties and ownership of copyrights shall be negotiated and determined hereafter upon initial review and approval of the research or study proposal by the [Tribal] Language and Culture Committee (Tribe 13)
b. Self-determination, capacity sharing, and community building
1. Empowerment	This a recurring term that refers to the sharing of "power" by researchers with the community and is premised on mutual respect. Where "power" means knowledge, credibility, personnel, and resources that are shared primarily through education, outreach, training, shared authorship, and employment.	This agreement will result in shared power, shared resources and mutual understanding and will ensure that studies proceed in a manner that is culturally sensitive, relevant and beneficial to the participants and communities of the [Tribe] (Tribe 25)	Empowerment is defined as a sharing of power and the result of a good research agreement developed by both the community and the researcher. Each of the participants feel that their needs are being met and that their credibility is increasing. Partnership and responsibility continue to grow as more and more respect and equity enter the agreement. The application of the research as a useful instru…
2. Return of / access to findings	This makes reference to the need to be updated on research activities and results/findings if the Tribe is to be able to benefit from the research activity. It recognises the different ways that return of results of access to findings might lead towards greater involvement in downstream activities.	The Tribe also needs to know how the Tribal community will have access to the project, research data or findings for the Tribe's own use. (Tribe 24)	Updates on all completed research activity, including any interim findings or a summary of any risks or benefits discovered. (Tribe 15)
3. Authorship and acknowledgement / credit in publications	One of the ways Tribes and Indigenous Nations have asserted their rights to the products of research is by demanding that researchers acknowledge and credit the Tribe or Nation and its citizens in any publications about the research.	The principle of equity and reciprocity recognizes the importance of sharing resources in any collaborative project. Reciprocity can take many forms, which may include giving back through financial and/or non-financial means, such as sharing knowledge, networking, or conducting needs-based projects. Other examples of reciprocity include, but are not limited to co-authorship, or in-kind materials …	If such publication or commercialization is contemplated, the applicant shall address how the Tribal community shall share in the authorship of publications or commercialization of the research findings. (Tribe 24)
4. Employment / Training	This makes reference to ways in which researchers can provide educational opportunities, outreach, and capacity building	I will employ or utilize local resources, with tribal members given first preference, in the project study, survey, and research. (Tribe 20)	In all phases of the project or activity, including both on and off reservation phases, preference shall be given to qualified [...] Tribal members in employment and training. (Tribe 18)
5. Technical Assistance	This makes reference to ways in which researchers can provide support for administrative tasks	Briefly explain how you plan to provide technical assistance to the community (writing grants, conducting in-service training sessions, developing educational materials, assisting with the annual community research conference and/ or donation of equipment). (Tribe 1)	Non-monetary forms of fair return are also valued. Benefits can take many forms and may extend beyond publications. Supporting the Tribe’s capacity-building goals is of particular import, and three prioritized areas are (1) engaging and advocating for tribal youth; (2) writing collaborative funding proposals; and (3) supporting the [...] Tribe’s network of libraries, archives and museums. (Tribe …
6. Health	This refers to the contributions that research can make towards communities’ health and wellness.	to ensure a mutual and beneficial partnership between [Tribal members] and researchers, and to ensure that all health-related research activities respect, promote, and benefit the health of [...] Tribal members. (Tribe 3)	They can do this by contributing something useful to our communities’ health and wellness, healthy-lifestyle goals and growth, self-esteem and resilience empowerment, traditional-caring responsibilities/commitments, and hoped-for/targeted benefits to our unborn future generations. (Tribe 11)
