# Supplementary material for: Extending the CARE Principles from tribal research policies to benefit sharing in genomic research
Source: Front Genet. 2022 Nov 11;13:1052620. doi: 10.3389/fgene.2022.1052620 (PMC9691892; doi:10.3389/fgene.2022.1052620)
Supplement: Supplementary file 2 [file Table1.XLSX]

## Sheet: Supplementary Table 1 (redact)
Supplemental Table 1: Themes of Benefits within Tribal Research Codes
Benefits of research generally: In discussing the benefits of research, the documents are intentional in unpacking who the beneficiaries of research are. This differs from the mainstream approach, where research is assumed as a general matter to support the “public good” or be in the “public interest” – often without describing who “the public” is and, therefore, which parts of the public are rec…
Intent/Benefit to the Tribe. The applicant must clearly outline and discuss the intent of the research project and the benefit(s) that the project, research or activity will have to the Tribal community. Some questions to be answered are: (1) what are the anticipated consequences or results/outcomes of the project; (2) what groups will be affected and what groups will benefit; and (3) in what way…
A good research agreement will be developed to ensure that studies proceed in a manner that is both culturally sensitive and relevant to the participants and community. .... The Research Advisory Committee will help to ensure that the proposed research benefits the community, gives the people of [the Tribe] an opportunity to be involved in decision making processes and empowers those involved thr…
Research outcomes can help drive decisions crucial to tribal members. (Tribe 16)
…explicit aim of the second [Tribal] research legislation was to ensure that research conducted within the [Tribe] is beneficial to the tribe, community-based and consistent with [Tribal] values, priorities and concerns. (Tribe 1)
Collective (i.e., tribal, community) benefit/value/relevance/interest: In discussing the benefits of research, the documents make a point to distinguish how such benefits need to be assessed/measured at the collective (i.e., tribal) level and not just that of the individual participant (which is how the Belmont Principles/Common Rule measures benefit/risk. (See Collective Benefit in CARE Principl…
The tribe will only support research that had benefits to its people or communities. Please make sure that your research aligns with the agendas of the tribe or contributes to an under-researched need for its people. (Tribe 15)
The proposal must demonstrate how the participants and the community at large will be given fair and appropriate return. Just compensation or fair return includes but is not limited to: obtaining copies of the research findings, authorship, co-authorship or acknowledgment, royalties, fair monetary compensation, copyright, patent, trademark, compensation for expenses incurred in reviewing/advising…
They can do this by contributing something useful to our communities’ health and wellness, healthy-lifestyle goals and growth, self-esteem and resilience empowerment, traditional-caring responsibilities/commitments, and hoped-for/targeted benefits to our unborn future generations. (Tribe 11)
Lack of benefit: The documents mention past (and continuing) experiences in which research with Indigenous communities was not designed to provide benefit to the affected communities. A few also note ways that tribes are acknowledging and addressing this lack of benefit in research, ranging from denial (White Earth, 2014) to permission with notification of lack of benefit (Cherokee, 2019).
Indigenous knowledge, cultural and biogenetic resources, and intellectual property rights have been and continue to be damaged, destroyed, stolen, and misappropriated, both on and off the Reservation. Members of the Tribe have been the subjects of human research for decades, with virtually no benefits returning to the Tribe from such research (Tribe 2)
Primary reason for vote to deny; e.g.: A. Failure of application to demonstrate substantial potential benefits of research findings and process/es to the tribe, communities, individuals; B. Unlikely possibility of any potential benefit to the general fund of useful human knowledge (Tribe 11)
To conduct study activities with only the researcher’s or an external entity’s benefits in mind. Such that the participants or study community has no long-lasting benefits beyond that of the study’s initial investigation. (Tribe 15)
Benefit-risk/harm balancing: In addition to discussing the benefits of research to various constituents (individual, tribal, national, science, etc.), the documents incorporate the balancing of benefits against risks or harms, which is also part of the Belmont Principles/Common Rule.
“Adequate Knowledge” means that the potential research participant is informed of all possible risks and benefits of the proposed research (Tribe 8)
Any action taken will be for the benefit of and to prevent harm to the sovereignty of the [...] Tribe, the people, land, and resources, including but not limited to language and culture. (Tribe 16)
This Ordinance shall establish a research review process as a mechanism to improve relations between the Tribe and scientists/researchers, and to promote collaboration within the framework of mutual respect, equity, and empowerment, and to identify benefits and risks to the Tribal community. (Tribe 24)
Approval by the [mechanism] means that a community based organization has reviewed the research proposal and agreed that this project appears to potentially benefit the community and/or environment of [the Tribe] without causing obvious or substantial harm to the environment, community and individual persons residing in [Tribal territory]. (Tribe 6)
Restrictions on/prohibitions of commercialization/profit: Some codes require specific application and permissions for commercialization of research results and data. A few codes also provide for sharing authorship of publications or commercialization of the research findings and sharing of the proceeds/profits of the commercialization.
No entity may seek to patent or commercialize any biological materials obtained from the Tribe, the Tribe's jurisdiction, or under the authority of the Tribe including but not limited to, genetic samples, any copies of the original genetic samples, any cell lines derived from collected materials, and data derived from these samples. (Tribe 4)
A sworn notarized declaration of noncommercial use of research products is required in conjunction with an Academic Research Agreement. (Tribe 4)
This Protocol should in no way be construed as being a call for commoditization or commercialization of the intellectual resources of [Tribal members]. The [...] Tribe reserves the right to NOT sell, commoditize or have expropriated from them certain domains of knowledge or information. (Tribe 18)
